# Supplementary material for: Endocytic delivery of lipocalin-siderophore-iron complex rescues the kidney from ischemia-reperfusion injury
Source: JCI journal article supplement (doi:10.1172/jci23056), 2005-03-01
Supplement: sd1 [file 1]

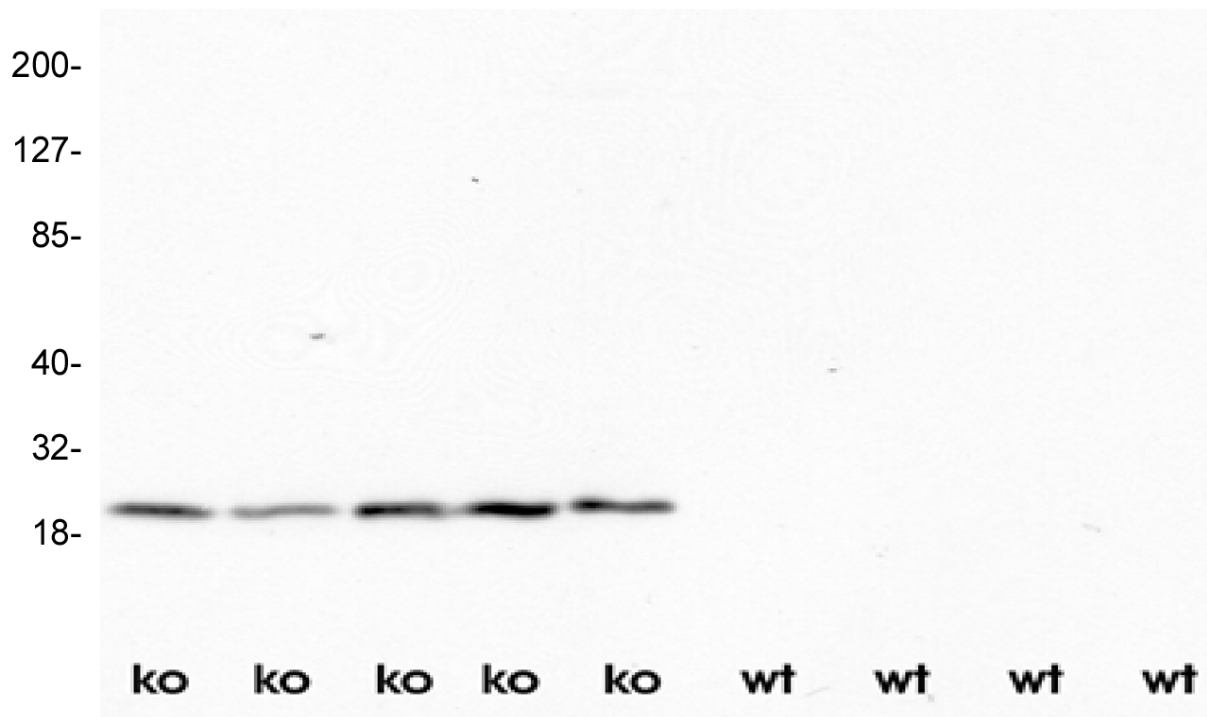

### Supplemental Figure

Detection of Ngal in the urine of megalin knockout mice (ko) but not in the wild-type urine (wt) by polyclonal anti-Ngal antibody. Each lane was loaded with urine (5  $\mu$ l). The detection of Ngal in the urine suggests that megalin is the Ngal receptor. However, Hilpert et al. (ref. 64) has shown that Ngal mRNA is overexpressed by the kidney in these animals indicating that urinary Ngal might have derived by enhanced synthesis. The samples were the generous gifts of T. Willnow and E.I. Christensen.
